# Supplementary material for: NMR studies of group 8 metallodrugs:187Os-enriched organo-osmium half-sandwich anticancer complex
Source: Royal Society of Chemistry journal article supplement (doi:10.1039/d1dt02213j), 2021-01-01
Supplement: d1dt02213j1.pdf [file d1dt02213j1.pdf]

# **NMR studies of group 8 metallodrugs: $^{187}\text{Os}$ -enriched organo-osmium half-sandwich anticancer complex**

Russell J. Needham, Ivan Prokes, Abraha Habtemariam, Isolda Romero-Canelón,<sup>#</sup> Guy J. Clarkson, Peter J. Sadler<sup>†</sup>

*Department of Chemistry, University of Warwick, Gibbet Hill Road, Coventry CV4 7AL, UK.*

*Email: P.J.Sadler@warwick.ac.uk*

<sup>#</sup>Current address: School of Pharmacy, Institute of Clinical Sciences, University of Birmingham, Birmingham B15 2TT, UK

## **Supporting Information**

**Tables S1-S2**

**p S2**

**Figures S1-S2**

**p S3, S4**

**Table S1:** X-ray crystal structure parameters

| Parameter                             | Complex 1                                                           |
|---------------------------------------|---------------------------------------------------------------------|
| Formula                               | C <sub>23</sub> H <sub>28</sub> BrF <sub>6</sub> N <sub>4</sub> OsP |
| Molar mass /g mol <sup>-1</sup>       | 775.57                                                              |
| Density /mg m <sup>-3</sup>           | 1.998                                                               |
| Crystal system                        | Triclinic                                                           |
| Crystal dimensions /mm                | 0.60 x 0.40 x 0.14                                                  |
| Space group                           | P-1                                                                 |
| Crystal character                     | Purple block                                                        |
| <i>a</i> /Å                           | 8.3424(2)                                                           |
| <i>b</i> /Å                           | 12.5262(4)                                                          |
| <i>c</i> /Å                           | 12.6754(3)                                                          |
| <i>a</i> /deg                         | 85.480(2)                                                           |
| <i>β</i> /deg                         | 79.486(2)                                                           |
| <i>γ</i> /deg                         | 82.407(2)                                                           |
| <i>T</i> /K                           | 100(2)                                                              |
| <i>Z</i>                              | 2                                                                   |
| <i>R</i> [ <i>F</i> > 4σ( <i>F</i> )] | 0.0358                                                              |
| R <sub>w</sub>                        | 0.0886                                                              |
| GOF                                   | 1.038                                                               |
| Δρ max and min /eÅ <sup>-3</sup>      | 2.816 & -2.520                                                      |

**Table S2:** A2780 human ovarian cancer cytotoxicity of complexes [Os(η<sup>6</sup>-*p*-cym)(*N,N*-Azpy-NMe<sub>2</sub>)X]PF<sub>6</sub> for a 24 h drug exposure with 72 h recovery time. X = Cl, Br, I.

| Complex           | IC <sub>50</sub> (μM) |
|-------------------|-----------------------|
| 1-Cl <sup>a</sup> | 1.8±0.1               |
| 1-Br              | 0.40±0.01             |
| 1-I <sup>a</sup>  | 0.18±0.01             |

<sup>a</sup>Taken from reference<sup>29</sup>

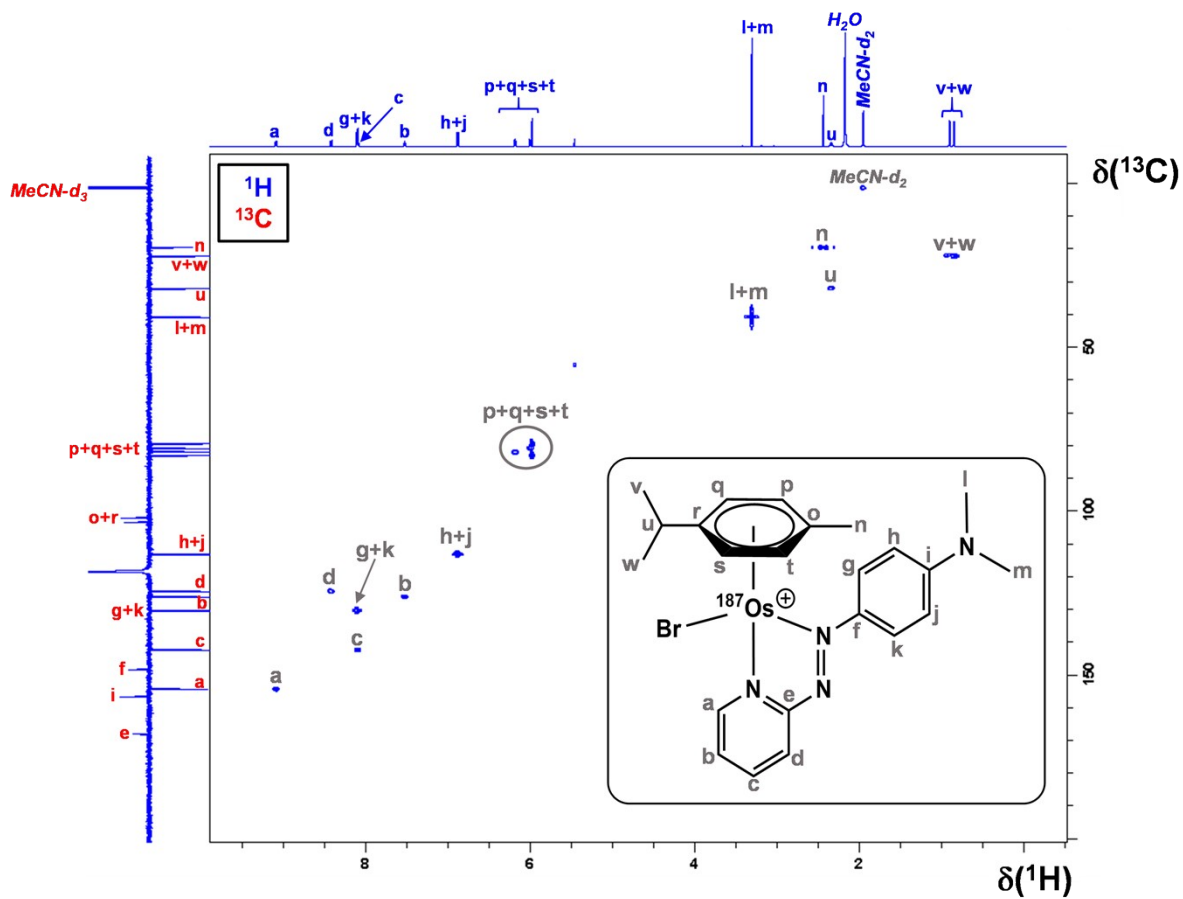

**Figure S1:**  $^{13}\text{C}$  –  $^1\text{H}$  HMQC 2D NMR spectrum of complex 1 in  $\text{MeCN-}d_3$ . Channel F1  $^1\text{H}$ , 600 MHz, channel F2  $^{13}\text{C}$ , 150 MHz.

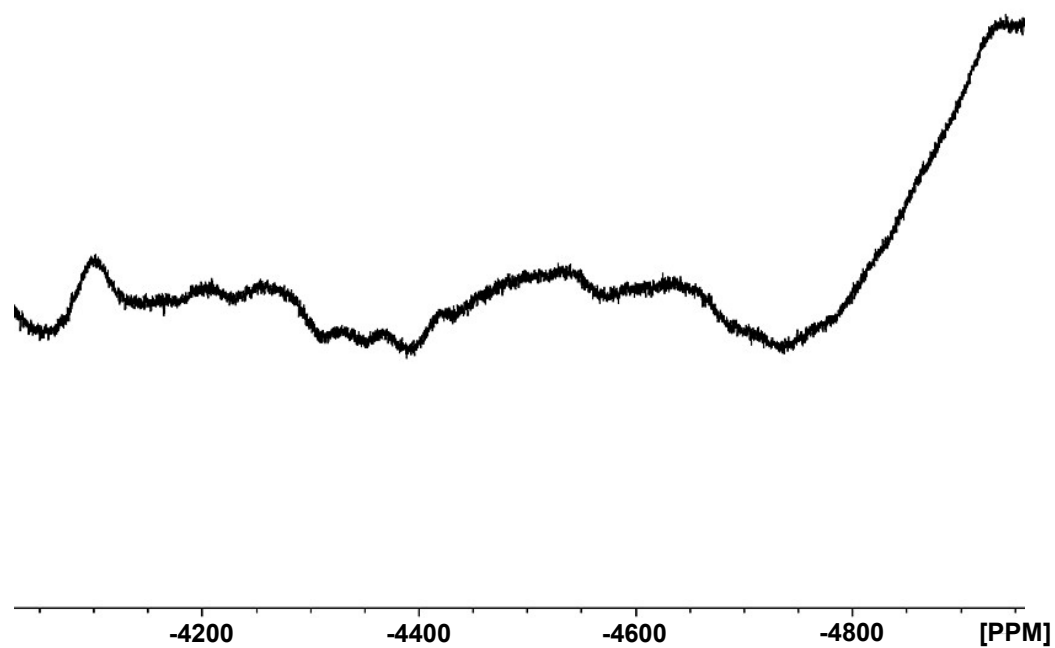

**Figure S2:** Attempt on direct  $^{187}\text{Os}$  NMR detection for  $[\text{}^{187}\text{Os}]\text{-1}$  (13.69 MHz). Only baseline noise is present.
